# Supplementary material for: Genistein Supplementation and Bone Health in Breast Cancer in Rats
Source: MDPI journal article supplement (doi:10.3390/nu16060912), 2024-03-21
Supplement: s1 [file s1]

**Table S1.** Spearman's correlation coefficient of elements in the bones of rats receiving the standard diet.

|           | Ca                    | Zn                   | K                    | Mg                    | Na                    | Fe                    | Cu                   | B                     | V                    | Cr                   | Mn                   | Ni                   | As                    | Se                   | Rb                    | Sr                    | Ba                    |
|-----------|-----------------------|----------------------|----------------------|-----------------------|-----------------------|-----------------------|----------------------|-----------------------|----------------------|----------------------|----------------------|----------------------|-----------------------|----------------------|-----------------------|-----------------------|-----------------------|
| <b>Ca</b> | ---                   | r=0.476,<br>p=0.243  | r=0.238,<br>p=0.582  | r=0.976,<br>p<0.001 * | r=0.429,<br>p=0.299   | r=-0.167,<br>p=0.703  | r=0.143,<br>p=0.752  | r=-0.214,<br>p=0.619  | r=0.476,<br>p=0.243  | r=0.119,<br>p=0.793  | r=0.333,<br>p=0.428  | r=-0.167,<br>p=0.703 | r=-0.262,<br>p=0.536  | r=-0.095,<br>p=0.84  | r=0.262,<br>p=0.536   | r=0.69,<br>p=0.069    | r=0.643,<br>p=0.096   |
| <b>Zn</b> | r=0.476,<br>p=0.243   | ---                  | r=-0.071,<br>p=0.882 | r=-0.5,<br>p=0.216    | r=0.095,<br>p=0.84    | r=-0.405,<br>p=0.327  | r=0.095,<br>p=0.84   | r=0.286,<br>p=0.501   | r=0.595,<br>p=0.132  | r=0.429,<br>p=0.299  | r=0.286,<br>p=0.501  | r=0.429,<br>p=0.299  | r=0.071,<br>p=0.882   | r=-0.167,<br>p=0.703 | r=0.071,<br>p=0.882   | r=0.81,<br>p=0.022 *  | r=0.095,<br>p=0.84    |
| <b>K</b>  | r=0.238,<br>p=0.582   | r=-0.071,<br>p=0.882 | ---                  | r=0.19,<br>p=0.665    | r=-0.548,<br>p=0.171  | r=-0.238,<br>p=0.582  | r=0.333,<br>p=0.428  | r=0.571,<br>p=0.151   | r=-0.333,<br>p=0.428 | r=-0.119,<br>p=0.793 | r=0.048,<br>p=0.935  | r=-0.024,<br>p=0.977 | r=-0.5,<br>p=0.216    | r=-0.048,<br>p=0.935 | r=0.905,<br>p=0.005 * | r=0.214,<br>p=0.619   | r=-0.143,<br>p=0.752  |
| <b>Mg</b> | r=0.976,<br>p<0.001 * | r=0.5,<br>p=0.216    | r=0.19,<br>p=0.665   | ---                   | r=0.524,<br>p=0.197   | r=-0.143,<br>p=0.752  | r=0.071,<br>p=0.882  | r=-0.286,<br>p=0.501  | r=0.452,<br>p=0.267  | r=0.024,<br>p=0.977  | r=0.214,<br>p=0.619  | r=-0.071,<br>p=0.882 | r=-0.238,<br>p=0.582  | r=-0.167,<br>p=0.703 | r=0.19,<br>p=0.665    | r=0.619,<br>p=0.115   | r=0.714,<br>p=0.058   |
| <b>Na</b> | r=0.429,<br>p=0.299   | r=0.095,<br>p=0.84   | r=-0.548,<br>p=0.171 | r=0.524,<br>p=0.197   | ---                   | r=0.524,<br>p=0.197   | r=-0.429,<br>p=0.299 | r=-0.81,<br>p=0.022 * | r=0.357,<br>p=0.389  | r=-0.071,<br>p=0.882 | r=-0.19,<br>p=0.665  | r=0.024,<br>p=0.977  | r=0.429,<br>p=0.299   | r=-0.024,<br>p=0.977 | r=-0.524,<br>p=0.197  | r=0, p=1              | r=0.786,<br>p=0.028 * |
| <b>Fe</b> | r=-0.167,<br>p=0.703  | r=-0.405,<br>p=0.327 | r=-0.238,<br>p=0.582 | r=-0.143,<br>p=0.752  | r=0.524,<br>p=0.197   | ---                   | r=-0.69,<br>p=0.069  | r=-0.429,<br>p=0.299  | r=-0.214,<br>p=0.619 | r=-0.071,<br>p=0.882 | r=-0.548,<br>p=0.171 | r=0.214,<br>p=0.619  | r=0.762,<br>p=0.037 * | r=0.31,<br>p=0.462   | r=-0.238,<br>p=0.582  | r=-0.381,<br>p=0.36   | r=0.381,<br>p=0.36    |
| <b>Cu</b> | r=0.143,<br>p=0.752   | r=0.095,<br>p=0.84   | r=0.333,<br>p=0.428  | r=0.071,<br>p=0.882   | r=-0.429,<br>p=0.299  | r=-0.69,<br>p=0.069   | ---                  | r=0.5,<br>p=0.216     | r=0.286,<br>p=0.501  | r=0.357,<br>p=0.389  | r=0.81,<br>p=0.022 * | r=-0.5,<br>p=0.216   | r=-0.595,<br>p=0.132  | r=-0.286,<br>p=0.501 | r=0.405,<br>p=0.327   | r=0.357,<br>p=0.389   | r=-0.548,<br>p=0.171  |
| <b>B</b>  | r=-0.214,<br>p=0.619  | r=0.286,<br>p=0.501  | r=0.571,<br>p=0.151  | r=-0.286,<br>p=0.501  | r=-0.81,<br>p=0.022 * | r=-0.429,<br>p=0.299  | r=0.5,<br>p=0.216    | ---                   | r=-0.143,<br>p=0.752 | r=0.476,<br>p=0.243  | r=0.262,<br>p=0.536  | r=0.286,<br>p=0.501  | r=-0.214,<br>p=0.619  | r=-0.19,<br>p=0.665  | r=0.595,<br>p=0.132   | r=0.333,<br>p=0.428   | r=-0.714,<br>p=0.058  |
| <b>V</b>  | r=0.476,<br>p=0.243   | r=0.595,<br>p=0.132  | r=-0.333,<br>p=0.428 | r=0.452,<br>p=0.267   | r=0.357,<br>p=0.389   | r=-0.214,<br>p=0.619  | r=0.286,<br>p=0.501  | r=-0.143,<br>p=0.752  | ---                  | r=0.238,<br>p=0.582  | r=0.714,<br>p=0.058  | r=-0.333,<br>p=0.428 | r=0.238,<br>p=0.582   | r=0.333,<br>p=0.428  | r=0.024,<br>p=0.977   | r=0.738,<br>p=0.046 * | r=0.024,<br>p=0.977   |
| <b>Cr</b> | r=0.119,<br>p=0.793   | r=0.429,<br>p=0.299  | r=-0.119,<br>p=0.793 | r=0.024,<br>p=0.977   | r=-0.071,<br>p=0.882  | r=-0.071,<br>p=0.882  | r=0.357,<br>p=0.389  | r=0.476,<br>p=0.243   | r=0.238,<br>p=0.582  | ---                  | r=0.405,<br>p=0.327  | r=0.238,<br>p=0.582  | r=0.143,<br>p=0.752   | r=-0.381,<br>p=0.36  | r=-0.071,<br>p=0.882  | r=0.452,<br>p=0.267   | r=-0.238,<br>p=0.582  |
| <b>Mn</b> | r=0.333,<br>p=0.428   | r=0.286,<br>p=0.501  | r=0.048,<br>p=0.935  | r=0.214,<br>p=0.619   | r=-0.19,<br>p=0.665   | r=-0.548,<br>p=0.171  | r=0.81,<br>p=0.022 * | r=0.262,<br>p=0.536   | r=0.714,<br>p=0.058  | r=0.405,<br>p=0.327  | ---                  | r=-0.643,<br>p=0.096 | r=-0.262,<br>p=0.536  | r=0.143,<br>p=0.752  | r=0.31,<br>p=0.462    | r=0.643,<br>p=0.096   | r=-0.405,<br>p=0.327  |
| <b>Ni</b> | r=-0.167,<br>p=0.703  | r=0.429,<br>p=0.299  | r=-0.024,<br>p=0.977 | r=-0.071,<br>p=0.882  | r=0.024,<br>p=0.977   | r=0.214,<br>p=0.619   | r=-0.5,<br>p=0.216   | r=0.286,<br>p=0.501   | r=-0.333,<br>p=0.428 | r=0.238,<br>p=0.582  | r=-0.643,<br>p=0.096 | ---                  | r=0.333,<br>p=0.428   | r=-0.381,<br>p=0.36  | r=-0.167,<br>p=0.703  | r=-0.024,<br>p=0.977  | r=0.143,<br>p=0.752   |
| <b>As</b> | r=-0.262,<br>p=0.536  | r=0.071,<br>p=0.882  | r=-0.5,<br>p=0.216   | r=-0.238,<br>p=0.582  | r=0.429,<br>p=0.299   | r=0.762,<br>p=0.037 * | r=-0.595,<br>p=0.132 | r=-0.214,<br>p=0.619  | r=0.238,<br>p=0.582  | r=0.143,<br>p=0.752  | r=-0.262,<br>p=0.536 | r=0.333,<br>p=0.428  | ---                   | r=0.476,<br>p=0.243  | r=-0.286,<br>p=0.501  | r=-0.024,<br>p=0.977  | r=0.071,<br>p=0.882   |
| <b>Se</b> | r=-0.095,<br>p=0.84   | r=-0.167,<br>p=0.703 | r=-0.048,<br>p=0.935 | r=-0.167,<br>p=0.703  | r=-0.024,<br>p=0.977  | r=0.31,<br>p=0.462    | r=-0.286,<br>p=0.501 | r=-0.19,<br>p=0.665   | r=0.333,<br>p=0.428  | r=-0.381,<br>p=0.36  | r=0.143,<br>p=0.752  | r=-0.381,<br>p=0.36  | r=0.476,<br>p=0.243   | ---                  | r=0.262,<br>p=0.536   | r=0.119,<br>p=0.793   | r=-0.119,<br>p=0.793  |

|           | Ca                  | Zn                   | K                     | Mg                  | Na                    | Fe                   | Cu                   | B                    | V                     | Cr                   | Mn                   | Ni                   | As                   | Se                   | Rb                   | Sr                  | Ba                   |
|-----------|---------------------|----------------------|-----------------------|---------------------|-----------------------|----------------------|----------------------|----------------------|-----------------------|----------------------|----------------------|----------------------|----------------------|----------------------|----------------------|---------------------|----------------------|
| <b>Rb</b> | r=0.262,<br>p=0.536 | r=0.071,<br>p=0.882  | r=0.905,<br>p=0.005 * | r=0.19,<br>p=0.665  | r=-0.524,<br>p=0.197  | r=-0.238,<br>p=0.582 | r=0.405,<br>p=0.327  | r=0.595,<br>p=0.132  | r=0.024,<br>p=0.977   | r=-0.071,<br>p=0.882 | r=0.31,<br>p=0.462   | r=-0.167,<br>p=0.703 | r=-0.286,<br>p=0.501 | r=0.262,<br>p=0.536  | ---                  | r=0.452,<br>p=0.267 | r=-0.286,<br>p=0.501 |
| <b>Sr</b> | r=0.69,<br>p=0.069  | r=0.81,<br>p=0.022 * | r=0.214,<br>p=0.619   | r=0.619,<br>p=0.115 | r=0, p=1              | r=-0.381,<br>p=0.36  | r=0.357,<br>p=0.389  | r=0.333,<br>p=0.428  | r=0.738,<br>p=0.046 * | r=0.452,<br>p=0.267  | r=0.643,<br>p=0.096  | r=-0.024,<br>p=0.977 | r=-0.024,<br>p=0.977 | r=0.119,<br>p=0.793  | r=0.452,<br>p=0.267  | ---                 | r=0.024,<br>p=0.977  |
| <b>Ba</b> | r=0.643,<br>p=0.096 | r=0.095,<br>p=0.84   | r=-0.143,<br>p=0.752  | r=0.714,<br>p=0.058 | r=0.786,<br>p=0.028 * | r=0.381,<br>p=0.36   | r=-0.548,<br>p=0.171 | r=-0.714,<br>p=0.058 | r=0.024,<br>p=0.977   | r=-0.238,<br>p=0.582 | r=-0.405,<br>p=0.327 | r=0.143,<br>p=0.752  | r=0.071,<br>p=0.882  | r=-0.119,<br>p=0.793 | r=-0.286,<br>p=0.501 | r=0.024,<br>p=0.977 | ---                  |

r - Spearman's correlation coefficient

\* statistically significant (p<0.05)

**Table S2.** Spearman's correlation coefficient of elements in the bone of rats receiving macrogenistein.

|    | Ca                     | Zn                     | K                      | Mg                     | Na                     | Fe                     | Cu                    | B                      | V                     | Cr                     | Mn                     | Ni                     | As                     | Se                   | Rb                     | Sr                    | Ba                     |
|----|------------------------|------------------------|------------------------|------------------------|------------------------|------------------------|-----------------------|------------------------|-----------------------|------------------------|------------------------|------------------------|------------------------|----------------------|------------------------|-----------------------|------------------------|
| Ca | ---                    | r=0.667,<br>p=0.059    | r=-0.653,<br>p=0.057   | r=0.183,<br>p=0.644    | r=0.867,<br>p=0.005 *  | r=0.483,<br>p=0.194    | r=-0.033,<br>p=0.948  | r=-0.517,<br>p=0.162   | r=-0.233,<br>p=0.552  | r=0.65,<br>p=0.067     | r=0.8,<br>p=0.014 *    | r=0.7,<br>p=0.043 *    | r=-0.133,<br>p=0.744   | r=-0.383,<br>p=0.312 | r=-0.767,<br>p=0.021 * | r=-0.55,<br>p=0.133   | r=-0.083,<br>p=0.843   |
| Zn | r=0.667,<br>p=0.059    | ---                    | r=-0.937,<br>p<0.001 * | r=0.45,<br>p=0.23      | r=0.917,<br>p=0.001 *  | r=0.483,<br>p=0.194    | r=0.1,<br>p=0.81      | r=-0.45,<br>p=0.23     | r=-0.4,<br>p=0.291    | r=0.483,<br>p=0.194    | r=0.933,<br>p=0.001 *  | r=0.933,<br>p=0.001 *  | r=-0.433,<br>p=0.25    | r=-0.633,<br>p=0.076 | r=-0.867,<br>p=0.005 * | r=-0.033,<br>p=0.948  | r=0.35,<br>p=0.359     |
| K  | r=-0.653,<br>p=0.057   | r=-0.937,<br>p<0.001 * | ---                    | r=-0.393,<br>p=0.295   | r=-0.895,<br>p=0.001 * | r=-0.452,<br>p=0.222   | r=-0.042,<br>p=0.915  | r=0.46,<br>p=0.213     | r=0.418,<br>p=0.262   | r=-0.452,<br>p=0.222   | r=-0.904,<br>p=0.001 * | r=-0.954,<br>p<0.001 * | r=0.427,<br>p=0.252    | r=0.636,<br>p=0.066  | r=0.904,<br>p=0.001 *  | r=0.151,<br>p=0.699   | r=-0.251,<br>p=0.515   |
| Mg | r=0.183,<br>p=0.644    | r=0.45,<br>p=0.23      | r=-0.393,<br>p=0.295   | ---                    | r=0.433,<br>p=0.25     | r=-0.433,<br>p=0.25    | r=0.733,<br>p=0.031 * | r=-0.5,<br>p=0.178     | r=-0.85,<br>p=0.006 * | r=-0.433,<br>p=0.25    | r=0.467,<br>p=0.213    | r=0.467,<br>p=0.213    | r=-0.867,<br>p=0.005 * | r=-0.35,<br>p=0.359  | r=-0.383,<br>p=0.312   | r=0.683,<br>p=0.05    | r=0.867,<br>p=0.005 *  |
| Na | r=0.867,<br>p=0.005 *  | r=0.917,<br>p=0.001 *  | r=-0.895,<br>p=0.001 * | r=0.433,<br>p=0.25     | ---                    | r=0.383,<br>p=0.312    | r=0.15,<br>p=0.708    | r=-0.417,<br>p=0.27    | r=-0.483,<br>p=0.194  | r=0.483,<br>p=0.194    | r=0.933,<br>p=0.001 *  | r=0.883,<br>p=0.003 *  | r=-0.433,<br>p=0.25    | r=-0.6,<br>p=0.097   | r=-0.917,<br>p=0.001 * | r=-0.233,<br>p=0.552  | r=0.233,<br>p=0.552    |
| Fe | r=0.483,<br>p=0.194    | r=0.483,<br>p=0.194    | r=-0.452,<br>p=0.222   | r=-0.433,<br>p=0.25    | r=0.383,<br>p=0.312    | ---                    | r=-0.7,<br>p=0.043 *  | r=-0.933,<br>p=0.001 * | r=0.483,<br>p=0.194   | r=0.867,<br>p=0.005 *  | r=0.417,<br>p=0.27     | r=0.467,<br>p=0.213    | r=0.45,<br>p=0.23      | r=-0.317,<br>p=0.41  | r=-0.45,<br>p=0.23     | r=-0.617,<br>p=0.086  | r=-0.533,<br>p=0.148   |
| Cu | r=-0.033,<br>p=0.948   | r=0.1,<br>p=0.81       | r=-0.042,<br>p=0.915   | r=0.733,<br>p=0.031 *  | r=0.15,<br>p=0.708     | r=-0.7,<br>p=0.043 *   | ---                   | r=0.8,<br>p=0.014 *    | r=-0.65,<br>p=0.067   | r=-0.5,<br>p=0.178     | r=0.2,<br>p=0.613      | r=0.15,<br>p=0.708     | r=-0.583,<br>p=0.108   | r=0.25,<br>p=0.521   | r=0.033,<br>p=0.948    | r=0.633,<br>p=0.076   | r=0.8,<br>p=0.014 *    |
| B  | r=-0.517,<br>p=0.162   | r=-0.45,<br>p=0.23     | r=0.46,<br>p=0.213     | r=0.5,<br>p=0.178      | r=-0.417,<br>p=0.27    | r=-0.933,<br>p=0.001 * | r=0.8,<br>p=0.014 *   | ---                    | r=-0.4,<br>p=0.291    | r=-0.833,<br>p=0.008 * | r=-0.383,<br>p=0.312   | r=-0.383,<br>p=0.312   | r=-0.367,<br>p=0.336   | r=0.45,<br>p=0.23    | r=0.517,<br>p=0.162    | r=0.733,<br>p=0.031 * | r=0.6,<br>p=0.097      |
| V  | r=-0.233,<br>p=0.552   | r=-0.4,<br>p=0.291     | r=0.418,<br>p=0.262    | r=-0.85,<br>p=0.006 *  | r=-0.483,<br>p=0.194   | r=0.483,<br>p=0.194    | r=-0.65,<br>p=0.067   | r=-0.4,<br>p=0.291     | ---                   | r=0.483,<br>p=0.194    | r=-0.417,<br>p=0.27    | r=-0.367,<br>p=0.336   | r=0.967,<br>p<0.001 *  | r=0.5,<br>p=0.178    | r=0.533,<br>p=0.148    | r=-0.483,<br>p=0.194  | r=-0.7,<br>p=0.043 *   |
| Cr | r=0.65,<br>p=0.067     | r=0.483,<br>p=0.194    | r=-0.452,<br>p=0.222   | r=-0.433,<br>p=0.25    | r=0.483,<br>p=0.194    | r=0.867,<br>p=0.005 *  | r=-0.5,<br>p=0.178    | r=-0.833,<br>p=0.008 * | r=0.483,<br>p=0.194   | ---                    | r=0.55,<br>p=0.133     | r=0.5,<br>p=0.178      | r=0.483,<br>p=0.194    | r=-0.05,<br>p=0.912  | r=-0.383,<br>p=0.312   | r=-0.75,<br>p=0.025 * | r=-0.433,<br>p=0.25    |
| Mn | r=0.8,<br>p=0.014 *    | r=0.933,<br>p=0.001 *  | r=-0.904,<br>p=0.001 * | r=0.467,<br>p=0.213    | r=0.933,<br>p=0.001 *  | r=0.417,<br>p=0.27     | r=0.2,<br>p=0.613     | r=-0.383,<br>p=0.312   | r=-0.417,<br>p=0.27   | r=0.55,<br>p=0.133     | ---                    | r=0.95,<br>p<0.001 *   | r=-0.417,<br>p=0.27    | r=-0.45,<br>p=0.23   | r=-0.833,<br>p=0.008 * | r=-0.15,<br>p=0.708   | r=0.367,<br>p=0.336    |
| Ni | r=0.7,<br>p=0.043 *    | r=0.933,<br>p=0.001 *  | r=-0.954,<br>p<0.001 * | r=0.467,<br>p=0.213    | r=0.883,<br>p=0.003 *  | r=0.467,<br>p=0.213    | r=0.15,<br>p=0.708    | r=-0.383,<br>p=0.312   | r=-0.367,<br>p=0.336  | r=0.5,<br>p=0.178      | r=0.95,<br>p<0.001 *   | ---                    | r=-0.367,<br>p=0.336   | r=-0.483,<br>p=0.194 | r=-0.833,<br>p=0.008 * | r=-0.1,<br>p=0.81     | r=0.317,<br>p=0.41     |
| As | r=-0.133,<br>p=0.744   | r=-0.433,<br>p=0.25    | r=0.427,<br>p=0.252    | r=-0.867,<br>p=0.005 * | r=-0.433,<br>p=0.25    | r=0.45,<br>p=0.23      | r=-0.583,<br>p=0.108  | r=-0.367,<br>p=0.336   | r=0.967,<br>p<0.001 * | r=0.483,<br>p=0.194    | r=-0.417,<br>p=0.27    | r=-0.367,<br>p=0.336   | ---                    | r=0.55,<br>p=0.133   | r=0.5,<br>p=0.178      | r=-0.583,<br>p=0.108  | r=-0.783,<br>p=0.017 * |
| Se | r=-0.383,<br>p=0.312   | r=-0.633,<br>p=0.076   | r=0.636,<br>p=0.066    | r=-0.35,<br>p=0.359    | r=-0.6,<br>p=0.097     | r=-0.317,<br>p=0.41    | r=0.25,<br>p=0.521    | r=0.45,<br>p=0.23      | r=0.5,<br>p=0.178     | r=-0.05,<br>p=0.912    | r=-0.45,<br>p=0.23     | r=-0.483,<br>p=0.194   | r=0.55,<br>p=0.133     | ---                  | r=0.8,<br>p=0.014 *    | r=-0.017,<br>p=0.982  | r=-0.083,<br>p=0.843   |
| Rb | r=-0.767,<br>p=0.021 * | r=-0.867,<br>p=0.005 * | r=0.904,<br>p=0.001 *  | r=-0.383,<br>p=0.312   | r=-0.917,<br>p=0.001 * | r=-0.45,<br>p=0.23     | r=0.033,<br>p=0.948   | r=0.517,<br>p=0.162    | r=0.533,<br>p=0.148   | r=-0.383,<br>p=0.312   | r=-0.833,<br>p=0.008 * | r=-0.833,<br>p=0.008 * | r=0.5,<br>p=0.178      | r=0.8,<br>p=0.014 *  | ---                    | r=0.233,<br>p=0.552   | r=-0.117,<br>p=0.776   |

|           | Ca                   | Zn                   | K                    | Mg                    | Na                   | Fe                   | Cu                  | B                     | V                    | Cr                    | Mn                  | Ni                 | As                     | Se                   | Rb                   | Sr                  | Ba                  |
|-----------|----------------------|----------------------|----------------------|-----------------------|----------------------|----------------------|---------------------|-----------------------|----------------------|-----------------------|---------------------|--------------------|------------------------|----------------------|----------------------|---------------------|---------------------|
| <b>Sr</b> | r=-0.55,<br>p=0.133  | r=-0.033,<br>p=0.948 | r=0.151,<br>p=0.699  | r=0.683,<br>p=0.05    | r=-0.233,<br>p=0.552 | r=-0.617,<br>p=0.086 | r=0.633,<br>p=0.076 | r=0.733,<br>p=0.031 * | r=-0.483,<br>p=0.194 | r=-0.75,<br>p=0.025 * | r=-0.15,<br>p=0.708 | r=-0.1,<br>p=0.81  | r=-0.583,<br>p=0.108   | r=-0.017,<br>p=0.982 | r=0.233,<br>p=0.552  | ---                 | r=0.8,<br>p=0.014 * |
| <b>Ba</b> | r=-0.083,<br>p=0.843 | r=0.35,<br>p=0.359   | r=-0.251,<br>p=0.515 | r=0.867,<br>p=0.005 * | r=0.233,<br>p=0.552  | r=-0.533,<br>p=0.148 | r=0.8,<br>p=0.014 * | r=0.6,<br>p=0.097     | r=-0.7,<br>p=0.043 * | r=-0.433,<br>p=0.25   | r=0.367,<br>p=0.336 | r=0.317,<br>p=0.41 | r=-0.783,<br>p=0.017 * | r=-0.083,<br>p=0.843 | r=-0.117,<br>p=0.776 | r=0.8,<br>p=0.014 * | ---                 |

r - Spearman's correlation coefficient

\* statistically significant (p<0.05)

**Table S3.** Spearman's correlation coefficient of elements in the bone of rats receiving microgenistein.

|    | Ca                     | Zn                     | K                     | Mg                     | Na                     | Fe                     | Cu                     | B                      | V                      | Cr                    | Mn                   | Ni                     | As                    | Se                     | Rb                    | Sr                     | Ba                     |
|----|------------------------|------------------------|-----------------------|------------------------|------------------------|------------------------|------------------------|------------------------|------------------------|-----------------------|----------------------|------------------------|-----------------------|------------------------|-----------------------|------------------------|------------------------|
| Ca | ---                    | r=0.433,<br>p=0.25     | r=0.883,<br>p=0.003 * | r=0.467,<br>p=0.213    | r=0.5,<br>p=0.178      | r=-0.483,<br>p=0.194   | r=-0.4,<br>p=0.291     | r=-0.417,<br>p=0.27    | r=0.433,<br>p=0.25     | r=0.517,<br>p=0.162   | r=0.2,<br>p=0.613    | r=-0.867,<br>p=0.005 * | r=0.367,<br>p=0.336   | r=0.9,<br>p=0.002 *    | r=0.917,<br>p=0.001 * | r=0.483,<br>p=0.194    | r=0.833,<br>p=0.008 *  |
| Zn | r=0.433,<br>p=0.25     | ---                    | r=0.45,<br>p=0.23     | r=0.833,<br>p=0.008 *  | r=0.933,<br>p=0.001 *  | r=-0.917,<br>p=0.001 * | r=-0.883,<br>p=0.003 * | r=0.5,<br>p=0.178      | r=-0.433,<br>p=0.25    | r=-0.45,<br>p=0.23    | r=0.467,<br>p=0.213  | r=-0.4,<br>p=0.291     | r=-0.4,<br>p=0.291    | r=0.417,<br>p=0.27     | r=0.5,<br>p=0.178     | r=0.867,<br>p=0.005 *  | r=0.517,<br>p=0.162    |
| K  | r=0.883,<br>p=0.003 *  | r=0.45,<br>p=0.23      | ---                   | r=0.433,<br>p=0.25     | r=0.383,<br>p=0.312    | r=-0.367,<br>p=0.336   | r=-0.433,<br>p=0.25    | r=-0.4,<br>p=0.291     | r=0.467,<br>p=0.213    | r=0.45,<br>p=0.23     | r=0.017,<br>p=0.982  | r=-0.95,<br>p<0.001 *  | r=0.45,<br>p=0.23     | r=0.917,<br>p=0.001 *  | r=0.85,<br>p=0.006 *  | r=0.517,<br>p=0.162    | r=0.917,<br>p=0.001 *  |
| Mg | r=0.467,<br>p=0.213    | r=0.833,<br>p=0.008 *  | r=0.433,<br>p=0.25    | ---                    | r=0.867,<br>p=0.005 *  | r=-0.883,<br>p=0.003 * | r=-0.917,<br>p=0.001 * | r=0.433,<br>p=0.25     | r=-0.5,<br>p=0.178     | r=-0.433,<br>p=0.25   | r=0.433,<br>p=0.25   | r=-0.517,<br>p=0.162   | r=-0.483,<br>p=0.194  | r=0.433,<br>p=0.25     | r=0.417,<br>p=0.27    | r=0.9,<br>p=0.002 *    | r=0.4,<br>p=0.291      |
| Na | r=0.5,<br>p=0.178      | r=0.933,<br>p=0.001 *  | r=0.383,<br>p=0.312   | r=0.867,<br>p=0.005 *  | ---                    | r=-0.983,<br>p<0.001 * | r=-0.9,<br>p=0.002 *   | r=0.433,<br>p=0.25     | r=-0.417,<br>p=0.27    | r=-0.433,<br>p=0.25   | r=0.5,<br>p=0.178    | r=-0.367,<br>p=0.336   | r=-0.483,<br>p=0.194  | r=0.45,<br>p=0.23      | r=0.517,<br>p=0.162   | r=0.883,<br>p=0.003 *  | r=0.433,<br>p=0.25     |
| Fe | r=-0.483,<br>p=0.194   | r=-0.917,<br>p=0.001 * | r=-0.367,<br>p=0.336  | r=-0.883,<br>p=0.003 * | r=-0.983,<br>p<0.001 * | ---                    | r=0.883,<br>p=0.003 *  | r=-0.417,<br>p=0.27    | r=0.433,<br>p=0.25     | r=0.417,<br>p=0.27    | r=-0.517,<br>p=0.162 | r=0.383,<br>p=0.312    | r=0.467,<br>p=0.213   | r=-0.417,<br>p=0.27    | r=-0.533,<br>p=0.148  | r=-0.867,<br>p=0.005 * | r=-0.417,<br>p=0.27    |
| Cu | r=-0.4,<br>p=0.291     | r=-0.883,<br>p=0.003 * | r=-0.433,<br>p=0.25   | r=-0.917,<br>p=0.001 * | r=-0.9,<br>p=0.002 *   | r=0.883,<br>p=0.003 *  | ---                    | r=-0.383,<br>p=0.312   | r=0.417,<br>p=0.27     | r=0.533,<br>p=0.148   | r=-0.2,<br>p=0.613   | r=0.467,<br>p=0.213    | r=0.433,<br>p=0.25    | r=-0.5,<br>p=0.178     | r=-0.417,<br>p=0.27   | r=-0.883,<br>p=0.003 * | r=-0.483,<br>p=0.194   |
| B  | r=-0.417,<br>p=0.27    | r=0.5,<br>p=0.178      | r=-0.4,<br>p=0.291    | r=0.433,<br>p=0.25     | r=0.433,<br>p=0.25     | r=-0.417,<br>p=0.27    | r=-0.383,<br>p=0.312   | ---                    | r=-0.933,<br>p=0.001 * | r=-0.85,<br>p=0.006 * | r=0.617,<br>p=0.086  | r=0.45,<br>p=0.23      | r=-0.9,<br>p=0.002 *  | r=-0.483,<br>p=0.194   | r=-0.45,<br>p=0.23    | r=0.467,<br>p=0.213    | r=-0.433,<br>p=0.25    |
| V  | r=0.433,<br>p=0.25     | r=-0.433,<br>p=0.25    | r=0.467,<br>p=0.213   | r=-0.5,<br>p=0.178     | r=-0.417,<br>p=0.27    | r=0.433,<br>p=0.25     | r=0.417,<br>p=0.27     | r=-0.933,<br>p=0.001 * | ---                    | r=0.883,<br>p=0.003 * | r=-0.533,<br>p=0.148 | r=-0.433,<br>p=0.25    | r=0.883,<br>p=0.003 * | r=0.467,<br>p=0.213    | r=0.483,<br>p=0.194   | r=-0.4,<br>p=0.291     | r=0.45,<br>p=0.23      |
| Cr | r=0.517,<br>p=0.162    | r=-0.45,<br>p=0.23     | r=0.45,<br>p=0.23     | r=-0.433,<br>p=0.25    | r=-0.433,<br>p=0.25    | r=0.417,<br>p=0.27     | r=0.533,<br>p=0.148    | r=-0.85,<br>p=0.006 *  | r=0.883,<br>p=0.003 *  | ---                   | r=-0.217,<br>p=0.581 | r=-0.45,<br>p=0.23     | r=0.85,<br>p=0.006 *  | r=0.383,<br>p=0.312    | r=0.5,<br>p=0.178     | r=-0.417,<br>p=0.27    | r=0.383,<br>p=0.312    |
| Mn | r=0.2,<br>p=0.613      | r=0.467,<br>p=0.213    | r=0.017,<br>p=0.982   | r=0.433,<br>p=0.25     | r=0.5,<br>p=0.178      | r=-0.517,<br>p=0.162   | r=-0.2,<br>p=0.613     | r=0.617,<br>p=0.086    | r=-0.533,<br>p=0.148   | r=-0.217,<br>p=0.581  | ---                  | r=0.067,<br>p=0.88     | r=-0.567,<br>p=0.121  | r=-0.1,<br>p=0.81      | r=0.083,<br>p=0.843   | r=0.517,<br>p=0.162    | r=-0.133,<br>p=0.744   |
| Ni | r=-0.867,<br>p=0.005 * | r=-0.4,<br>p=0.291     | r=-0.95,<br>p<0.001 * | r=-0.517,<br>p=0.162   | r=-0.367,<br>p=0.336   | r=0.383,<br>p=0.312    | r=0.467,<br>p=0.213    | r=0.45,<br>p=0.23      | r=-0.433,<br>p=0.25    | r=-0.45,<br>p=0.23    | r=0.067,<br>p=0.88   | ---                    | r=-0.45,<br>p=0.23    | r=-0.883,<br>p=0.003 * | r=-0.85,<br>p=0.006 * | r=-0.483,<br>p=0.194   | r=-0.883,<br>p=0.003 * |
| As | r=0.367,<br>p=0.336    | r=-0.4,<br>p=0.291     | r=0.45,<br>p=0.23     | r=-0.483,<br>p=0.194   | r=-0.483,<br>p=0.194   | r=0.467,<br>p=0.213    | r=0.433,<br>p=0.25     | r=-0.9,<br>p=0.002 *   | r=0.883,<br>p=0.003 *  | r=0.85,<br>p=0.006 *  | r=-0.567,<br>p=0.121 | r=-0.45,<br>p=0.23     | ---                   | r=0.433,<br>p=0.25     | r=0.45,<br>p=0.23     | r=-0.517,<br>p=0.162   | r=0.533,<br>p=0.148    |
| Se | r=0.9,<br>p=0.002 *    | r=0.417,<br>p=0.27     | r=0.917,<br>p=0.001 * | r=0.433,<br>p=0.25     | r=0.45,<br>p=0.23      | r=-0.417,<br>p=0.27    | r=-0.5,<br>p=0.178     | r=-0.483,<br>p=0.194   | r=0.467,<br>p=0.213    | r=0.383,<br>p=0.312   | r=-0.1,<br>p=0.81    | r=-0.883,<br>p=0.003 * | r=0.433,<br>p=0.25    | ---                    | r=0.833,<br>p=0.008 * | r=0.467,<br>p=0.213    | r=0.917,<br>p=0.001 *  |

|           | Ca                    | Zn                    | K                     | Mg                  | Na                    | Fe                     | Cu                     | B                   | V                   | Cr                  | Mn                   | Ni                     | As                   | Se                    | Rb                    | Sr                 | Ba                    |
|-----------|-----------------------|-----------------------|-----------------------|---------------------|-----------------------|------------------------|------------------------|---------------------|---------------------|---------------------|----------------------|------------------------|----------------------|-----------------------|-----------------------|--------------------|-----------------------|
| <b>Rb</b> | r=0.917,<br>p=0.001 * | r=0.5,<br>p=0.178     | r=0.85,<br>p=0.006 *  | r=0.417,<br>p=0.27  | r=0.517,<br>p=0.162   | r=-0.533,<br>p=0.148   | r=-0.417,<br>p=0.27    | r=-0.45,<br>p=0.23  | r=0.483,<br>p=0.194 | r=0.5,<br>p=0.178   | r=0.083,<br>p=0.843  | r=-0.85,<br>p=0.006 *  | r=0.45,<br>p=0.23    | r=0.833,<br>p=0.008 * | ---                   | r=0.433,<br>p=0.25 | r=0.883,<br>p=0.003 * |
| <b>Sr</b> | r=0.483,<br>p=0.194   | r=0.867,<br>p=0.005 * | r=0.517,<br>p=0.162   | r=0.9,<br>p=0.002 * | r=0.883,<br>p=0.003 * | r=-0.867,<br>p=0.005 * | r=-0.883,<br>p=0.003 * | r=0.467,<br>p=0.213 | r=-0.4,<br>p=0.291  | r=-0.417,<br>p=0.27 | r=0.517,<br>p=0.162  | r=-0.483,<br>p=0.194   | r=-0.517,<br>p=0.162 | r=0.467,<br>p=0.213   | r=0.433,<br>p=0.25    | ---                | r=0.4,<br>p=0.291     |
| <b>Ba</b> | r=0.833,<br>p=0.008 * | r=0.517,<br>p=0.162   | r=0.917,<br>p=0.001 * | r=0.4,<br>p=0.291   | r=0.433,<br>p=0.25    | r=-0.417,<br>p=0.27    | r=-0.483,<br>p=0.194   | r=-0.433,<br>p=0.25 | r=0.45,<br>p=0.23   | r=0.383,<br>p=0.312 | r=-0.133,<br>p=0.744 | r=-0.883,<br>p=0.003 * | r=0.533,<br>p=0.148  | r=0.917,<br>p=0.001 * | r=0.883,<br>p=0.003 * | r=0.4,<br>p=0.291  | ---                   |

r - Spearman's correlation coefficient

\* statistically significant (p<0.05)

**Table S4.** Spearman's correlation coefficient of elements in the bone of rats receiving nanogenistein.

|    | Ca                    | Zn                    | K                     | Mg                     | Na                    | Fe                    | Cu                    | B                     | V                     | Cr                     | Mn                    | Ni                     | As                     | Se                    | Rb                    | Sr                     | Ba                     |
|----|-----------------------|-----------------------|-----------------------|------------------------|-----------------------|-----------------------|-----------------------|-----------------------|-----------------------|------------------------|-----------------------|------------------------|------------------------|-----------------------|-----------------------|------------------------|------------------------|
| Ca | ---                   | r=-0.433,<br>p=0.25   | r=-0.45,<br>p=0.23    | r=-0.85,<br>p=0.006 *  | r=0.533,<br>p=0.148   | r=0.95,<br>p<0.001 *  | r=-0.433,<br>p=0.25   | r=0.15,<br>p=0.708    | r=0.2,<br>p=0.613     | r=0.933,<br>p=0.001 *  | r=0.9,<br>p=0.002 *   | r=0.75,<br>p=0.025 *   | r=0.933,<br>p=0.001 *  | r=0.383,<br>p=0.312   | r=-0.35,<br>p=0.359   | r=0.917,<br>p=0.001 *  | r=0.917,<br>p=0.001 *  |
| Zn | r=-0.433,<br>p=0.25   | ---                   | r=0.883,<br>p=0.003 * | r=0.483,<br>p=0.194    | r=0.433,<br>p=0.25    | r=-0.433,<br>p=0.25   | r=0.967,<br>p<0.001 * | r=0.483,<br>p=0.194   | r=0.533,<br>p=0.148   | r=-0.367,<br>p=0.336   | r=-0.417,<br>p=0.27   | r=-0.483,<br>p=0.194   | r=-0.417,<br>p=0.27    | r=0.4,<br>p=0.291     | r=0.883,<br>p=0.003 * | r=-0.383,<br>p=0.312   | r=-0.433,<br>p=0.25    |
| K  | r=-0.45,<br>p=0.23    | r=0.883,<br>p=0.003 * | ---                   | r=0.5,<br>p=0.178      | r=0.467,<br>p=0.213   | r=-0.45,<br>p=0.23    | r=0.883,<br>p=0.003 * | r=0.6,<br>p=0.097     | r=0.45,<br>p=0.23     | r=-0.483,<br>p=0.194   | r=-0.5,<br>p=0.178    | r=-0.667,<br>p=0.059   | r=-0.433,<br>p=0.25    | r=0.417,<br>p=0.27    | r=0.8,<br>p=0.014 *   | r=-0.467,<br>p=0.213   | r=-0.517,<br>p=0.162   |
| Mg | r=-0.85,<br>p=0.006 * | r=0.483,<br>p=0.194   | r=0.5,<br>p=0.178     | ---                    | r=-0.433,<br>p=0.25   | r=-0.85,<br>p=0.006 * | r=0.483,<br>p=0.194   | r=-0.2,<br>p=0.613    | r=-0.3,<br>p=0.437    | r=-0.883,<br>p=0.003 * | r=-0.9,<br>p=0.002 *  | r=-0.833,<br>p=0.008 * | r=-0.833,<br>p=0.008 * | r=-0.533,<br>p=0.148  | r=0.35,<br>p=0.359    | r=-0.867,<br>p=0.005 * | r=-0.917,<br>p=0.001 * |
| Na | r=0.533,<br>p=0.148   | r=0.433,<br>p=0.25    | r=0.467,<br>p=0.213   | r=-0.433,<br>p=0.25    | ---                   | r=0.483,<br>p=0.194   | r=0.433,<br>p=0.25    | r=0.767,<br>p=0.021 * | r=0.717,<br>p=0.037 * | r=0.45,<br>p=0.23      | r=0.417,<br>p=0.27    | r=0.15,<br>p=0.708     | r=0.467,<br>p=0.213    | r=0.867,<br>p=0.005 * | r=0.467,<br>p=0.213   | r=0.433,<br>p=0.25     | r=0.45,<br>p=0.23      |
| Fe | r=0.95,<br>p<0.001 *  | r=-0.433,<br>p=0.25   | r=-0.45,<br>p=0.23    | r=-0.85,<br>p=0.006 *  | r=0.483,<br>p=0.194   | ---                   | r=-0.383,<br>p=0.312  | r=0.15,<br>p=0.708    | r=0.283,<br>p=0.463   | r=0.933,<br>p=0.001 *  | r=0.95,<br>p<0.001 *  | r=0.833,<br>p=0.008 *  | r=0.983,<br>p<0.001 *  | r=0.433,<br>p=0.25    | r=-0.267,<br>p=0.493  | r=0.967,<br>p<0.001 *  | r=0.967,<br>p<0.001 *  |
| Cu | r=-0.433,<br>p=0.25   | r=0.967,<br>p<0.001 * | r=0.883,<br>p=0.003 * | r=0.483,<br>p=0.194    | r=0.433,<br>p=0.25    | r=-0.383,<br>p=0.312  | ---                   | r=0.583,<br>p=0.108   | r=0.617,<br>p=0.086   | r=-0.367,<br>p=0.336   | r=-0.367,<br>p=0.336  | r=-0.45,<br>p=0.23     | r=-0.4,<br>p=0.291     | r=0.433,<br>p=0.25    | r=0.967,<br>p<0.001 * | r=-0.35,<br>p=0.359    | r=-0.383,<br>p=0.312   |
| B  | r=0.15,<br>p=0.708    | r=0.483,<br>p=0.194   | r=0.6,<br>p=0.097     | r=-0.2,<br>p=0.613     | r=0.767,<br>p=0.021 * | r=0.15,<br>p=0.708    | r=0.583,<br>p=0.108   | ---                   | r=0.85,<br>p=0.006 *  | r=0.117,<br>p=0.776    | r=0.2,<br>p=0.613     | r=-0.033,<br>p=0.948   | r=0.067,<br>p=0.88     | r=0.817,<br>p=0.011 * | r=0.7,<br>p=0.043 *   | r=0.133,<br>p=0.744    | r=0.183,<br>p=0.644    |
| V  | r=0.2,<br>p=0.613     | r=0.533,<br>p=0.148   | r=0.45,<br>p=0.23     | r=-0.3,<br>p=0.437     | r=0.717,<br>p=0.037 * | r=0.283,<br>p=0.463   | r=0.617,<br>p=0.086   | r=0.85,<br>p=0.006 *  | ---                   | r=0.283,<br>p=0.463    | r=0.383,<br>p=0.312   | r=0.283,<br>p=0.463    | r=0.233,<br>p=0.552    | r=0.883,<br>p=0.003 * | r=0.75,<br>p=0.025 *  | r=0.317,<br>p=0.41     | r=0.367,<br>p=0.336    |
| Cr | r=0.933,<br>p=0.001 * | r=-0.367,<br>p=0.336  | r=-0.483,<br>p=0.194  | r=-0.883,<br>p=0.003 * | r=0.45,<br>p=0.23     | r=0.933,<br>p=0.001 * | r=-0.367,<br>p=0.336  | r=0.117,<br>p=0.776   | r=0.283,<br>p=0.463   | ---                    | r=0.967,<br>p<0.001 * | r=0.883,<br>p=0.003 *  | r=0.917,<br>p=0.001 *  | r=0.417,<br>p=0.27    | r=-0.267,<br>p=0.493  | r=0.983,<br>p<0.001 *  | r=0.95,<br>p<0.001 *   |
| Mn | r=0.9,<br>p=0.002 *   | r=-0.417,<br>p=0.27   | r=-0.5,<br>p=0.178    | r=-0.9,<br>p=0.002 *   | r=0.417,<br>p=0.27    | r=0.95,<br>p<0.001 *  | r=-0.367,<br>p=0.336  | r=0.2,<br>p=0.613     | r=0.383,<br>p=0.312   | r=0.967,<br>p<0.001 *  | ---                   | r=0.933,<br>p=0.001 *  | r=0.917,<br>p=0.001 *  | r=0.467,<br>p=0.213   | r=-0.217,<br>p=0.581  | r=0.983,<br>p<0.001 *  | r=0.983,<br>p<0.001 *  |
| Ni | r=0.75,<br>p=0.025 *  | r=-0.483,<br>p=0.194  | r=-0.667,<br>p=0.059  | r=-0.833,<br>p=0.008 * | r=0.15,<br>p=0.708    | r=0.833,<br>p=0.008 * | r=-0.45,<br>p=0.23    | r=-0.033,<br>p=0.948  | r=0.283,<br>p=0.463   | r=0.883,<br>p=0.003 *  | r=0.933,<br>p=0.001 * | ---                    | r=0.817,<br>p=0.011 *  | r=0.3,<br>p=0.437     | r=-0.3,<br>p=0.437    | r=0.9,<br>p=0.002 *    | r=0.917,<br>p=0.001 *  |
| As | r=0.933,<br>p=0.001 * | r=-0.417,<br>p=0.27   | r=-0.433,<br>p=0.25   | r=-0.833,<br>p=0.008 * | r=0.467,<br>p=0.213   | r=0.983,<br>p<0.001 * | r=-0.4,<br>p=0.291    | r=0.067,<br>p=0.88    | r=0.233,<br>p=0.552   | r=0.917,<br>p=0.001 *  | r=0.917,<br>p=0.001 * | r=0.817,<br>p=0.011 *  | ---                    | r=0.417,<br>p=0.27    | r=-0.317,<br>p=0.41   | r=0.95,<br>p<0.001 *   | r=0.933,<br>p=0.001 *  |
| Se | r=0.383,<br>p=0.312   | r=0.4,<br>p=0.291     | r=0.417,<br>p=0.27    | r=-0.533,<br>p=0.148   | r=0.867,<br>p=0.005 * | r=0.433,<br>p=0.25    | r=0.433,<br>p=0.25    | r=0.817,<br>p=0.011 * | r=0.883,<br>p=0.003 * | r=0.417,<br>p=0.27     | r=0.467,<br>p=0.213   | r=0.3,<br>p=0.437      | r=0.417,<br>p=0.27     | ---                   | r=0.533,<br>p=0.148   | r=0.433,<br>p=0.25     | r=0.483,<br>p=0.194    |

|           | Ca                    | Zn                    | K                    | Mg                     | Na                  | Fe                    | Cu                    | B                   | V                    | Cr                    | Mn                    | Ni                    | As                    | Se                  | Rb                   | Sr                    | Ba                    |
|-----------|-----------------------|-----------------------|----------------------|------------------------|---------------------|-----------------------|-----------------------|---------------------|----------------------|-----------------------|-----------------------|-----------------------|-----------------------|---------------------|----------------------|-----------------------|-----------------------|
| <b>Rb</b> | r=-0.35,<br>p=0.359   | r=0.883,<br>p=0.003 * | r=0.8,<br>p=0.014 *  | r=0.35,<br>p=0.359     | r=0.467,<br>p=0.213 | r=-0.267,<br>p=0.493  | r=0.967,<br>p<0.001 * | r=0.7,<br>p=0.043 * | r=0.75,<br>p=0.025 * | r=-0.267,<br>p=0.493  | r=-0.217,<br>p=0.581  | r=-0.3,<br>p=0.437    | r=-0.317,<br>p=0.41   | r=0.533,<br>p=0.148 | ---                  | r=-0.233,<br>p=0.552  | r=-0.233,<br>p=0.552  |
| <b>Sr</b> | r=0.917,<br>p=0.001 * | r=-0.383,<br>p=0.312  | r=-0.467,<br>p=0.213 | r=-0.867,<br>p=0.005 * | r=0.433,<br>p=0.25  | r=0.967,<br>p<0.001 * | r=-0.35,<br>p=0.359   | r=0.133,<br>p=0.744 | r=0.317,<br>p=0.41   | r=0.983,<br>p<0.001 * | r=0.983,<br>p<0.001 * | r=0.9,<br>p=0.002 *   | r=0.95,<br>p<0.001 *  | r=0.433,<br>p=0.25  | r=-0.233,<br>p=0.552 | ---                   | r=0.967,<br>p<0.001 * |
| <b>Ba</b> | r=0.917,<br>p=0.001 * | r=-0.433,<br>p=0.25   | r=-0.517,<br>p=0.162 | r=-0.917,<br>p=0.001 * | r=0.45,<br>p=0.23   | r=0.967,<br>p<0.001 * | r=-0.383,<br>p=0.312  | r=0.183,<br>p=0.644 | r=0.367,<br>p=0.336  | r=0.95,<br>p<0.001 *  | r=0.983,<br>p<0.001 * | r=0.917,<br>p=0.001 * | r=0.933,<br>p=0.001 * | r=0.483,<br>p=0.194 | r=-0.233,<br>p=0.552 | r=0.967,<br>p<0.001 * | ---                   |

r - Spearman's correlation coefficient

\* statistically significant (p<0.05)
